# Supplementary material for: A high-resolution air temperature data set for the Chinese Tian Shan in 1979–2016
Source: Copernicus journal article supplement (doi:10.5194/essd-10-2097-2018), 2018-11-27
Supplement: Supplementary file 1 [file essd-10-2097-2018-supplement.pdf]

Supplement of Earth Syst. Sci. Data, 10, 2097–2114, 2018  
<https://doi.org/10.5194/essd-10-2097-2018-supplement>  
© Author(s) 2018. This work is distributed under  
the Creative Commons Attribution 4.0 License.

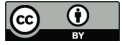

Open Access  
Earth System  
Science  
Data

*Supplement of*

## **A high-resolution air temperature data set for the Chinese Tian Shan in 1979–2016**

**L. Gao et al.**

*Correspondence to:* Lu Gao ([l.gao@foxmail.com](mailto:l.gao@foxmail.com))

The copyright of individual parts of the supplement might differ from the CC BY 4.0 License.

## Supplementary

Table S1. Elevation of averaged 9 DEM grids and the elevation differences with station elevation (m).

| ID      | averaged 9 DEM grids elevation | elevation Difference |
|---------|--------------------------------|----------------------|
| 1       | 1305                           | 50                   |
| 2       | 306                            | 14                   |
| 3       | 477                            | 2                    |
| 4       | 467                            | -26                  |
| 5       | 764                            | 30                   |
| 6       | 672                            | -9                   |
| 7       | 1885                           | -34                  |
| 8       | 893                            | 25                   |
| 9       | 2004                           | -251                 |
| 10      | 1101                           | 3                    |
| 11      | 868                            | 5                    |
| 12      | 940                            | -18                  |
| 13      | 2462                           | -4                   |
| 14      | 1057                           | -2                   |
| 15      | 11                             | 24                   |
| 16      | 1221                           | 8                    |
| 17      | 978                            | -2                   |
| 18      | 1066                           | 33                   |
| 19      | 937                            | -5                   |
| 20      | 1635                           | 3                    |
| 21      | 433                            | 46                   |
| 22      | 1814                           | -85                  |
| 23      | 758                            | -21                  |
| 24      | 1548                           | 20                   |
| Average |                                | <b>-8</b>            |

Table S2. Averaged NSE, RMSE and PDF-based skill scores between the original and corrected ERA-Interim temperature for different elevation groups.

|           | NSE      |            | RMSE     |            | PDF-based skill score |            |
|-----------|----------|------------|----------|------------|-----------------------|------------|
|           | original | correction | original | correction | original              | correction |
| 0-500     | 0.89     | 0.94       | 4.69     | 3.50       | 0.82                  | 0.92       |
| 500-1000  | 0.93     | 0.97       | 3.34     | 2.29       | 0.88                  | 0.93       |
| 1000-1500 | 0.94     | 0.96       | 3.03     | 2.39       | 0.88                  | 0.91       |
| 1500-2000 | 0.85     | 0.94       | 3.61     | 2.55       | 0.86                  | 0.90       |
| 2000-2500 | 0.78     | 0.69       | 6.65     | 7.80       | 0.71                  | 0.75       |

Table S3. Averaged RMSEs of seasonal temperatures between the original ERA-Interim and corrections for different elevation groups.

|           | Spring | Summer | Autumn | Winter |
|-----------|--------|--------|--------|--------|
| 0-500     | 1.28   | 1.14   | 1.67   | 4.30   |
| 500-1000  | 0.93   | 1.37   | 1.12   | 2.04   |
| 1000-1500 | 0.91   | 1.38   | 1.20   | 2.30   |
| 1500-2000 | 1.62   | 1.97   | 1.62   | 1.79   |
| 2000-2500 | 3.22   | 0.42   | 3.23   | 12.80  |

Table S4 Correlation between observed and modeled lapse rates ( $^{\circ}\text{C km}^{-1}$ ) for each month.

| Month     | Correlation |
|-----------|-------------|
| January   | 0.30        |
| February  | 0.30        |
| March     | 0.38        |
| April     | 0.74        |
| May       | 0.73        |
| June      | 0.49        |
| July      | 0.40        |
| August    | 0.41        |
| September | 0.60        |
| October   | 0.25        |
| November  | 0.38        |
| December  | 0.36        |

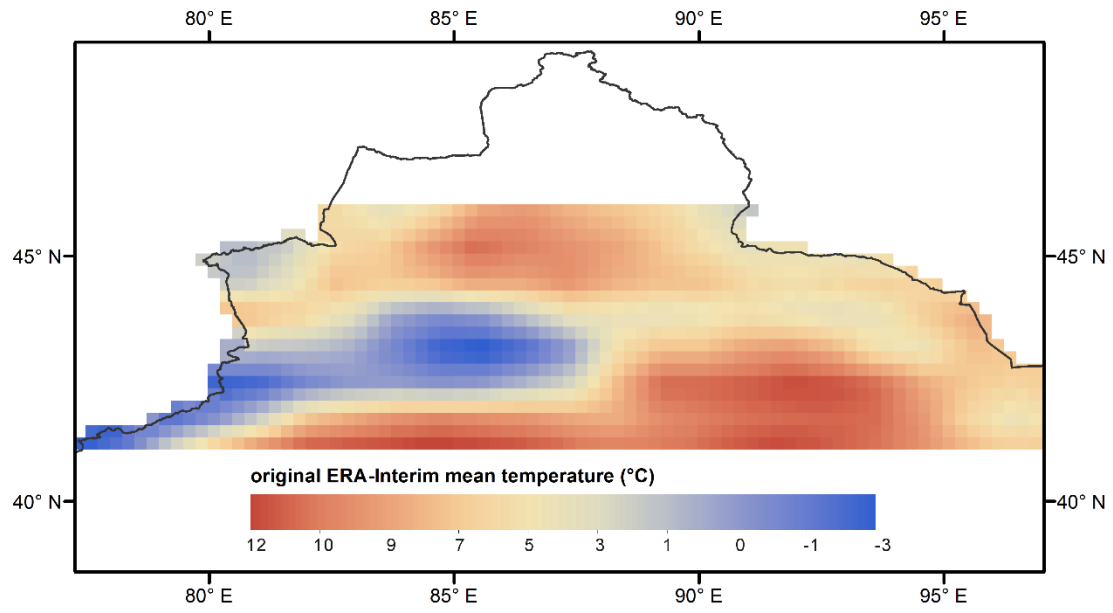

**Figure S1: Mean temperature of the entire CTM based on the original ERA-Interim.**

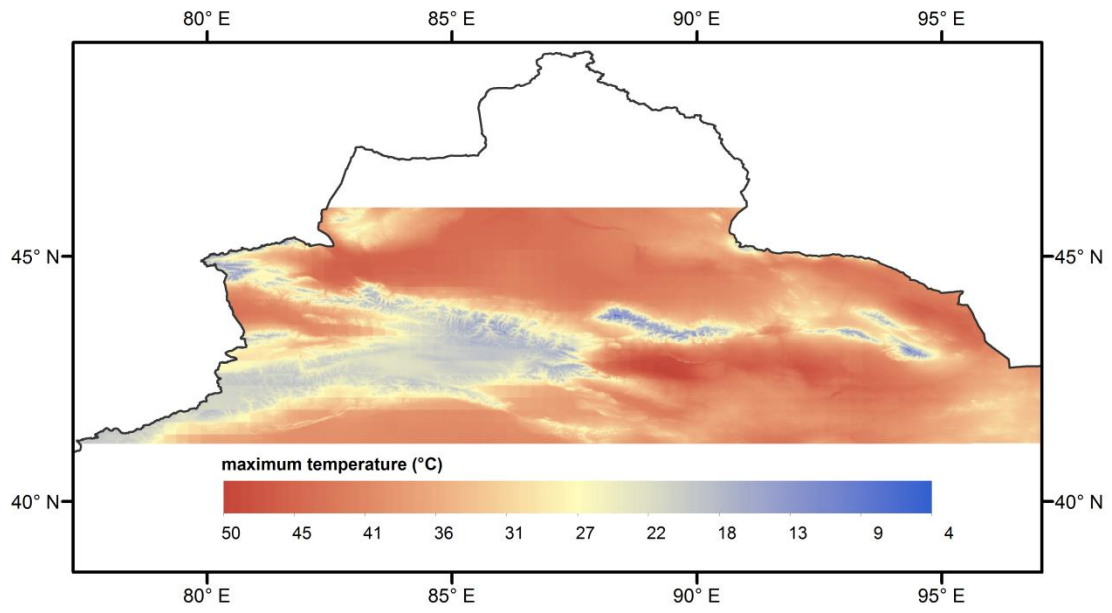

**Figure S2: Maximum temperature of the entire CTM based on the high-resolution data set.**

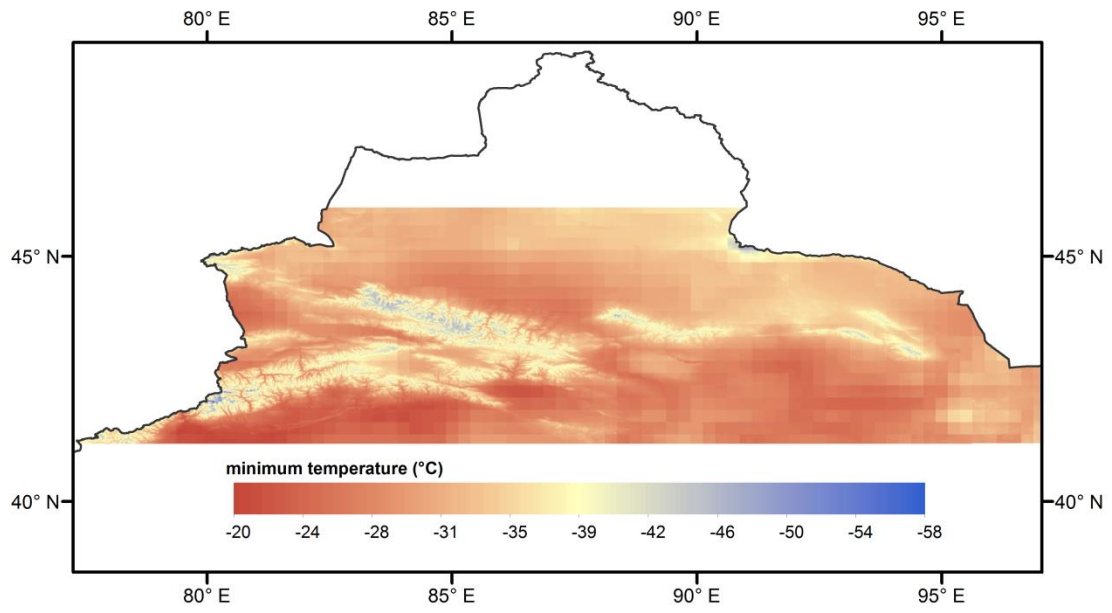

**Figure S3: Minimum temperature of the entire CTM based on the high-resolution data set.**
